# Supplementary material for: Characterization of the WAK Gene Family Reveals Genes for FHB Resistance in Bread Wheat (Triticum aestivum L.)
Source: MDPI journal article supplement (doi:10.3390/ijms23137157), 2022-06-28
Supplement: s1 [file s1]

**Table S2. Syntenic relationships between TaWAKs with other WAK genes in *H. vulgare*, *O. sativa* and *G.max*.**

| <b>Wheat</b>         | <b><i>H. vulgare</i></b>    |
|----------------------|-----------------------------|
| TraesCS2D02G442000.1 | HORVU.MOREX.r3.2HG0194210.1 |
| TraesCS2B02G464000.1 | HORVU.MOREX.r3.2HG0194210.1 |
| TraesCS5B02G324400.1 | HORVU.MOREX.r3.5HG0499530.1 |
| TraesCS2D02G508900.1 | HORVU.MOREX.r3.2HG0204030.1 |
| TraesCS7D02G053900.1 | HORVU.MOREX.r3.7HG0642910.1 |
| TraesCS5D02G268600.1 | HORVU.MOREX.r3.5HG0490230.1 |
| TraesCS5B02G247400.1 | HORVU.MOREX.r3.5HG0488230.1 |
| TraesCS5A02G084200.1 | HORVU.MOREX.r3.5HG0442460.1 |
| TraesCS5B02G089800.1 | HORVU.MOREX.r3.5HG0442460.1 |
| TraesCS5D02G096200.1 | HORVU.MOREX.r3.5HG0442460.1 |
| TraesCS5A02G261200.1 | HORVU.MOREX.r3.5HG0490230.1 |
| TraesCS5B02G259500.1 | HORVU.MOREX.r3.5HG0490230.1 |
| TraesCS6D02G032300.1 | HORVU.MOREX.r3.6HG0543140.1 |
| TraesCS5A02G249300.1 | HORVU.MOREX.r3.5HG0488230.1 |
| TraesCS7A02G242800.1 | HORVU.MOREX.r3.7HG0678660.1 |
| TraesCS5A02G323800.1 | HORVU.MOREX.r3.5HG0499530.1 |
| TraesCS7A02G013700.1 | HORVU.MOREX.r3.7HG0635610.1 |
| TraesCSU02G079300.1  | HORVU.MOREX.r3.6HG0543140.1 |
| TraesCS5D02G330600.1 | HORVU.MOREX.r3.5HG0499530.1 |
| TraesCS6B02G040700.1 | HORVU.MOREX.r3.6HG0543140.1 |
| TraesCS6A02G377500.1 | HORVU.MOREX.r3.6HG0627720.1 |
| TraesCS5D02G256700.1 | HORVU.MOREX.r3.5HG0488230.1 |
| TraesCS7A02G091100.1 | HORVU.MOREX.r3.7HG0649350.1 |
| TraesCS4A02G482400.1 | HORVU.MOREX.r3.7HG0635610.1 |
| TraesCS7D02G241700.1 | HORVU.MOREX.r3.7HG0678890.1 |
| TraesCS6B02G002495.1 | HORVU.MOREX.r3.6HG0538930.1 |
| TraesCS4A02G347600.1 | HORVU.MOREX.r3.5HG0531690.1 |
| TraesCS7D02G086900.1 | HORVU.MOREX.r3.7HG0649350.1 |
| TraesCS7A02G425700.1 | HORVU.MOREX.r3.7HG0728630.1 |
| TraesCS5B02G526000.1 | HORVU.MOREX.r3.5HG0531690.1 |
| TraesCS6A02G075500.1 | HORVU.MOREX.r3.6HG0550560.1 |
| TraesCS7D02G241500.1 | HORVU.MOREX.r3.7HG0678660.1 |
| TraesCS5D02G524800.1 | HORVU.MOREX.r3.5HG0531690.1 |
| TraesCS4A02G391000.1 | HORVU.MOREX.r3.7HG0649350.1 |
| TraesCS1D02G342300.1 | HORVU.MOREX.r3.1HG0077000.1 |
| TraesCS1B02G352600.1 | HORVU.MOREX.r3.1HG0077000.1 |
| TraesCS5A02G365300.1 | HORVU.MOREX.r3.5HG0506000.1 |
| TraesCS6B02G100300.1 | HORVU.MOREX.r3.6HG0550560.1 |
| TraesCS5B02G366900.1 | HORVU.MOREX.r3.5HG0506000.1 |
| TraesCS6D02G002500.1 | HORVU.MOREX.r3.6HG0539050.1 |
| TraesCS7D02G457100.1 | HORVU.MOREX.r3.7HG0736720.1 |
| TraesCS6D02G210200.1 | HORVU.MOREX.r3.6HG0596130.1 |
| TraesCS1A02G340300.1 | HORVU.MOREX.r3.1HG0077000.1 |
| TraesCS6B02G004000.1 | HORVU.MOREX.r3.6HG0539050.1 |
| TraesCS6A02G225300.1 | HORVU.MOREX.r3.6HG0596150.1 |
| TraesCS5D02G452200.1 | HORVU.MOREX.r3.5HG0520120.1 |
| TraesCS6B02G459100.1 | HORVU.MOREX.r3.6HG0632470.1 |

|                      |                             |
|----------------------|-----------------------------|
| TraesCS6A02G225400.1 | HORVU.MOREX.r3.6HG0596130.1 |
| TraesCS6B02G414900.1 | HORVU.MOREX.r3.6HG0627720.1 |
| TraesCS2A02G047600.1 | HORVU.MOREX.r3.2HG0101670.1 |
| TraesCS6B02G101400.1 | HORVU.MOREX.r3.6HG0550560.1 |
| TraesCS1D02G037200.1 | HORVU.MOREX.r3.1HG0006210.1 |
| TraesCS5D02G374500.1 | HORVU.MOREX.r3.5HG0506000.1 |
| TraesCS6D02G210100.1 | HORVU.MOREX.r3.6HG0596150.1 |
| TraesCS6D02G394600.1 | HORVU.MOREX.r3.6HG0632470.1 |
| TraesCS5D02G373700.1 | HORVU.MOREX.r3.5HG0506000.1 |
| TraesCS1B02G009600.1 | HORVU.MOREX.r3.1HG0000540.1 |
| TraesCS5D02G052800.1 | HORVU.MOREX.r3.5HG0429150.1 |
| TraesCS6A02G000200.1 | HORVU.MOREX.r3.6HG0539050.1 |
| TraesCS5B02G366400.1 | HORVU.MOREX.r3.5HG0505950.1 |
| TraesCS7B02G371300.1 | HORVU.MOREX.r3.7HG0736720.1 |
| TraesCS2D02G045900.1 | HORVU.MOREX.r3.2HG0101670.1 |
| TraesCS3B02G474400.1 | HORVU.MOREX.r3.3HG0312090.1 |
| TraesCS6D02G028700.1 | HORVU.MOREX.r3.6HG0542390.1 |
| TraesCS4A02G351600.1 | HORVU.MOREX.r3.5HG0531280.1 |
| TraesCS2D02G597700.1 | HORVU.MOREX.r3.2HG0214050.1 |
| TraesCS3D02G433100.1 | HORVU.MOREX.r3.3HG0312090.1 |
| TraesCS6B02G034300.1 | HORVU.MOREX.r3.6HG0542390.1 |
| TraesCS7A02G243000.1 | HORVU.MOREX.r3.7HG0678890.1 |
| TraesCS5B02G449200.1 | HORVU.MOREX.r3.5HG0520120.1 |
| TraesCS5A02G035200.1 | HORVU.MOREX.r3.5HG0427440.1 |
| TraesCS5D02G043400.1 | HORVU.MOREX.r3.5HG0427440.1 |
| TraesCS3D02G533100.1 | HORVU.MOREX.r3.3HG0328800.1 |
| TraesCS5A02G444600.1 | HORVU.MOREX.r3.5HG0520120.1 |
| TraesCS6D02G070300.1 | HORVU.MOREX.r3.6HG0550050.1 |
| TraesCS5D02G520500.1 | HORVU.MOREX.r3.5HG0531280.1 |
| TraesCS5B02G368200.1 | HORVU.MOREX.r3.5HG0506170.1 |
| TraesCS5A02G043600.1 | HORVU.MOREX.r3.5HG0429140.1 |
| TraesCS3D02G003900.1 | HORVU.MOREX.r3.3HG0219240.1 |
| TraesCS5D02G374600.1 | HORVU.MOREX.r3.5HG0506170.1 |
| TraesCS5D02G374300.1 | HORVU.MOREX.r3.5HG0505950.1 |
| TraesCS5D02G373400.1 | HORVU.MOREX.r3.5HG0505950.1 |
| TraesCS3A02G006900.1 | HORVU.MOREX.r3.3HG0219240.1 |
| TraesCS2A02G071800.1 | HORVU.MOREX.r3.2HG0103900.1 |
| TraesCS1D02G058800.1 | HORVU.MOREX.r3.1HG0012290.1 |
| TraesCS3B02G141500.1 | HORVU.MOREX.r3.3HG0240070.1 |
| TraesCS3D02G124200.1 | HORVU.MOREX.r3.3HG0240070.1 |
| TraesCS2D02G070600.1 | HORVU.MOREX.r3.2HG0103900.1 |
| TraesCS5A02G464700.1 | HORVU.MOREX.r3.5HG0524050.1 |
| TraesCS1A02G058200.1 | HORVU.MOREX.r3.1HG0012290.1 |
| TraesCS1B02G075700.1 | HORVU.MOREX.r3.1HG0012290.1 |
| TraesCS5D02G477400.1 | HORVU.MOREX.r3.5HG0524050.1 |
| TraesCS6D02G395400.1 | HORVU.MOREX.r3.6HG0632750.1 |
| TraesCS6B02G460900.1 | HORVU.MOREX.r3.6HG0632750.1 |
| TraesCS6A02G061200.1 | HORVU.MOREX.r3.6HG0548400.1 |
| TraesCS3D02G046000.1 | HORVU.MOREX.r3.3HG0226150.1 |
| TraesCS3D02G046900.1 | HORVU.MOREX.r3.3HG0226150.1 |
| TraesCS3A02G034600.1 | HORVU.MOREX.r3.3HG0225430.1 |

|                      |                             |
|----------------------|-----------------------------|
| TraesCS6D02G063400.1 | HORVU.MOREX.r3.6HG0548400.1 |
| TraesCS6B02G256200.1 | HORVU.MOREX.r3.6HG0596150.1 |
| TraesCS3A02G527700.1 | HORVU.MOREX.r3.3HG0328800.1 |

**Wheat**

***O. sativa***

|                      |              |
|----------------------|--------------|
| TraesCS2D02G442000.1 | Os04g0598900 |
| TraesCS2B02G464000.1 | Os04g0598900 |
| TraesCS5B02G247400.1 | Os09g0471200 |
| TraesCS6A02G376005.1 | Os02g0807200 |
| TraesCS6D02G032300.1 | Os02g0111600 |
| TraesCS6B02G413700.1 | Os02g0807200 |
| TraesCS5A02G249300.1 | Os09g0471200 |
| TraesCS7A02G242800.1 | Os08g0501200 |
| TraesCS6D02G361000.1 | Os02g0807200 |
| TraesCS6B02G040700.1 | Os02g0111600 |
| TraesCS5D02G256700.1 | Os09g0471200 |
| TraesCS4A02G347600.1 | Os03g0841100 |
| TraesCS7D02G086900.1 | Os06g0142500 |
| TraesCS5B02G526000.1 | Os03g0841100 |
| TraesCS7D02G241500.1 | Os08g0501200 |
| TraesCS5D02G524800.1 | Os03g0841100 |
| TraesCS4A02G391000.1 | Os06g0142500 |
| TraesCS7A02G091100.1 | Os06g0142500 |
| TraesCS5A02G365300.1 | Os09g0561450 |
| TraesCS7D02G136700.1 | Os06g0170100 |
| TraesCS6A02G225300.1 | Os02g0623600 |
| TraesCS6B02G256300.1 | Os02g0811200 |
| TraesCS6B02G414900.1 | Os02g0807200 |
| TraesCS6D02G210100.1 | Os02g0811200 |
| TraesCS2B02G464100.1 | Os04g0598600 |
| TraesCS5A02G035200.1 | Os12g0614851 |
| TraesCS5D02G043400.1 | Os12g0615000 |
| TraesCS5D02G043500.1 | Os12g0614851 |
| TraesCS3D02G046000.1 | Os01g0136400 |
| TraesCS3D02G046900.1 | Os01g0136800 |
| TraesCS3D02G046000.1 | Os01g0136800 |
| TraesCS6A02G376005.1 | Os02g0811200 |
| TraesCS6B02G414900.1 | Os02g0811200 |
| TraesCS6D02G361000.1 | Os02g0811200 |

**Wheat**

***G. max***

|                      |          |
|----------------------|----------|
| TraesCS3D02G046900.1 | KRH01725 |
|----------------------|----------|

---
