# Supplementary material for: Characterization of the WAK Gene Family Reveals Genes for FHB Resistance in Bread Wheat (Triticum aestivum L.)
Source: MDPI journal article supplement (doi:10.3390/ijms23137157), 2022-06-28
Supplement: s1 [file s1]

**Table S3. Primers sequences used in this study.**

| Name                     | Forward (5'-3')                      | Reverse (5'-3')                      | Purpose                  |
|--------------------------|--------------------------------------|--------------------------------------|--------------------------|
| TraesCS7D02G086900       | CTCTGGGAGCATCAGCATG                  | CGAATCTCACCCACAGTAAG                 | qRT-PCR                  |
| TraesCS7A02G091200       | CGTCTGCTGGGAGCATCAG                  | TGTCCAGTACCCTAACTTCGG                |                          |
| TraesCS7B02G148800       | AGCAGGCGAGCTGTGCTCA                  | GCACGCCCCTGGGAATGGA                  |                          |
| TraesCS7A02G242800       | GTTAGTGCACACCGTGGCTG                 | CACCGTGCCGCCAGGAATG                  |                          |
| TraesCS6B02G374000       | ATGGCGTCCCACAACCACAA                 | ACGTTGCCATGGAATAGCGC                 |                          |
| TraesCS6A02G342000       | CGTCCCACAACAGGAAGCC                  | ACGTTGGAAAAGAACGGCGC                 |                          |
| TraesCS3B02G141500       | GCCAGCAGATTCCTTCTGAT                 | GAGTTGTTTCGCGTTCAGGAT                |                          |
| TraesCS3D02G124200       | AGCAGATTCCTTCGGATTG                  | CTAGAGTTGTTGGCGTTCAG                 |                          |
| TraesCS5A02G445700       | AAGTCATCGGTGACTTGAGC                 | GACTGCCATCCCTGTCAGAT                 |                          |
| TraesCS5B02G458300       | ATCCTACACGGTGATGTAAAC                | CAACTCGGTTGCTTTGTTCCA                |                          |
| TraesCS5B02G454700       | CGTACATCGCCGATGGATGC                 | GGTCTTCCTTCTCTCTTTGCG                |                          |
| TraesCS3D02G046900       | ATGGGTTTAGTGCTTCAAGG                 | CGAGACGTGCAACCATATAA                 |                          |
| TraesCS5A02G365300       | GATCAGAGATGGCTGTGTCA                 | GTAGATGTCCCCTGTTTTGC                 |                          |
| TraesCS5B02G455500       | ACGCCACAGTTGGCCTCTCG                 | TCATAGAACTCCCTGGTCTTC                |                          |
| TraesCS5B02G454100       | CAGCAACAGCTACTGTGTCA                 | CATATCCTCCCAACCTGTTC                 |                          |
| TraesCS3A02G034600       | ATGTCTAGCATCGTCGTCGC                 | TGTGCGTCACCGCGTAGTCG                 |                          |
| TraesCS4A02G391100       | CTGAAGGTTATGAGGGCAATC                | GTCCTTCTCCTTCGCAAGCT                 |                          |
| TraesCS7D02G085800       | ATGTGTCCAATGGCCCTGGA                 | CAGCCCGTAGAGCAAAGATAC                |                          |
| TraesCS3D02G046000       | GCCTGCCGTTCTTGGCCTCG                 | TCGGCGCGGCACACGCCGT                  |                          |
| TraesCS2B02G536500       | CATCCTCGCAACGGTGACGG                 | GAGCAGCTTTGGTGGATGGC                 |                          |
| Tatubulin                | GTGGAAGTGGCTCTGGC                    | CGCTCAATGTCAAGGGA                    |                          |
| Ubi1300-5B02G454700-eGFP | AACGATAGCCGGTACCATGCCCACGCCCTCGCAATC | TGCTCACCATGGTACCGAGTCCAAGAACTTACGGTC | Subcellular localization |
| Ubi1300-3B02G141500-eGFP | AACGATAGCCGGTACCATGGCGAGACCGTTTTGCGG | TGCTCACCATGGTACCTACGTTTTGCTGCGGCTCCA |                          |
| Ubi1300-5A02G445700-eGFP | AACGATAGCCGGTACCATGCCCACGCCCTCCAAATC | TGCTCACCATGGTACCCCATCTACGAGACTTGTTC  |                          |
| Ubi1300-3D02G046900-eGFP | AACGATAGCCGGTACCATGGCTGCGCGTCTCATGCC | TGCTCACCATGGTACCGCATTTGTTGTAGATAATC  |                          |

|                              |                                          |                                         |
|------------------------------|------------------------------------------|-----------------------------------------|
| Ubi1300-2B02G536500-<br>eGFP | AACGATAGCCGGTACCATGTCACAAGCA<br>AAGCTCAT | TGCTCACCATGGTACCTCTTGGAATT<br>CAGATGATT |
|------------------------------|------------------------------------------|-----------------------------------------|

---
