# Supplementary material for: Characterization of the WAK Gene Family Reveals Genes for FHB Resistance in Bread Wheat (Triticum aestivum L.)
Source: MDPI journal article supplement (doi:10.3390/ijms23137157), 2022-06-28
Supplement: s1 [file s1]

**Table S1. The detailed information of 320 *TaWAK* genes.**

| <b>Gene ID</b>     | <b>Chr</b> | <b>Chromosomal location</b> |           | <b>PI</b> | <b>MW</b> |
|--------------------|------------|-----------------------------|-----------|-----------|-----------|
| TraesCS6B02G414200 | 6B         | 687305705                   | 687308164 | 6.14      | 85041.98  |
| TraesCS6B02G020700 | 6B         | 12653307                    | 12656688  | 5.63      | 103327.2  |
| TraesCS6B02G459100 | 6B         | 713755448                   | 713760135 | 5.98      | 106273.49 |
| TraesCS3A02G034600 | 3A         | 19471388                    | 19506635  | 7.33      | 76248.78  |
| TraesCS1A02G004800 | 1A         | 2934676                     | 2938176   | 6.69      | 71344.85  |
| TraesCS1D02G037200 | 1D         | 17627901                    | 17630762  | 5.77      | 82090.44  |
| TraesCS2D02G597700 | 2D         | 650076890                   | 650079892 | 6.45      | 79261.9   |
| TraesCS6D02G046818 | 6D         | 21077215                    | 21079777  | 8.65      | 87037.1   |
| TraesCS5B02G455500 | 5B         | 629895667                   | 629898862 | 6.37      | 78049.81  |
| TraesCS6A02G376000 | 6A         | 598064855                   | 598067329 | 8.16      | 82571.83  |
| TraesCS4D02G042400 | 4D         | 19774280                    | 19784471  | 6.19      | 77950.18  |
| TraesCS2B02G563800 | 2B         | 755591295                   | 755594459 | 8.79      | 77601.44  |
| TraesCS1A02G071657 | 1A         | 54015302                    | 54019064  | 6.42      | 74069.89  |
| TraesCS7B02G148700 | 7B         | 196377969                   | 196380924 | 5.8       | 82771.48  |
| TraesCS2B02G489700 | 2B         | 687205211                   | 687207726 | 6.19      | 82267.07  |
| TraesCS2D02G045900 | 2D         | 16762900                    | 16765259  | 8.26      | 81076.14  |
| TraesCS7B02G148800 | 7B         | 196382223                   | 196385469 | 5.83      | 81366.48  |
| TraesCS6B02G009105 | 6B         | 5793738                     | 5796725   | 6.52      | 68748.04  |
| TraesCS6A02G054500 | 6A         | 28410489                    | 28412881  | 6.98      | 81064.58  |
| TraesCS7A02G091200 | 7A         | 55382439                    | 55385069  | 5.6       | 85104.06  |
| TraesCS5D02G268600 | 5D         | 371844581                   | 371850931 | 5.81      | 82010.75  |
| TraesCSU02G185400  | Un         | 279469323                   | 279473147 | 5.71      | 83115.04  |
| TraesCS3D02G030600 | 3D         | 11333642                    | 11355705  | 8.07      | 71375.23  |
| TraesCS5D02G375200 | 5D         | 447631020                   | 447635524 | 6.42      | 116522.83 |
| TraesCS7D02G241500 | 7D         | 205737331                   | 205745926 | 5.61      | 77617.22  |
| TraesCS3B02G043877 | 3B         | 22424706                    | 22431800  | 7.75      | 104863.4  |
| TraesCS5A02G035200 | 5A         | 32705951                    | 32708571  | 7.62      | 86500.34  |
| TraesCS6A02G411900 | 6A         | 613969591                   | 613976261 | 5.98      | 105017.54 |
| TraesCS6A02G075500 | 6A         | 45652841                    | 45655794  | 5.94      | 82223.48  |
| TraesCS7A02G103000 | 7A         | 63125013                    | 63127930  | 6.66      | 78932.36  |
| TraesCS7A02G243000 | 7A         | 218255715                   | 218259563 | 6.95      | 74376.04  |
| TraesCS2D02G511000 | 2D         | 602697291                   | 602705377 | 7.96      | 81959.89  |
| TraesCS6A02G225300 | 6A         | 423521951                   | 423524411 | 5.61      | 84010.26  |
| TraesCS6B02G004000 | 6B         | 3122693                     | 3127984   | 6.52      | 100275.78 |
| TraesCS4A02G391200 | 4A         | 668093684                   | 668096362 | 5.64      | 79381.15  |
| TraesCSU02G054452  | Un         | 42526297                    | 42529678  | 7.61      | 100848.88 |
| TraesCS7D02G136700 | 7D         | 87995980                    | 87998917  | 5.83      | 82201.78  |
| TraesCS6B02G097000 | 6B         | 73162947                    | 73175855  | 5.77      | 117670.53 |
| TraesCSU02G079300  | Un         | 71305191                    | 71308194  | 5.65      | 81845.2   |
| TraesCS7B02G371400 | 7B         | 637478137                   | 637496216 | 5.97      | 79002     |
| TraesCS5D02G281200 | 5D         | 382487986                   | 382490384 | 6.63      | 76801.6   |
| TraesCS2B02G604500 | 2B         | 786102579                   | 786105550 | 7.18      | 83608.78  |
| TraesCS5B02G063600 | 5B         | 71514389                    | 71521162  | 6.86      | 76464.42  |
| TraesCS6B02G009100 | 6B         | 5790320                     | 5793270   | 6.1       | 69523.1   |
| TraesCS2B02G231700 | 2B         | 228758409                   | 228761398 | 6.16      | 80226.75  |
| TraesCS3D02G003900 | 3D         | 1655945                     | 1659437   | 5.72      | 82785.31  |
| TraesCS5D02G375400 | 5D         | 447704942                   | 447707718 | 6.57      | 84779.94  |
| TraesCS4A02G351600 | 4A         | 627355663                   | 627358542 | 5.65      | 82765.36  |
| TraesCS1D02G010100 | 1D         | 5421419                     | 5424921   | 5.9       | 83041.99  |

|                    |    |           |           |      |           |
|--------------------|----|-----------|-----------|------|-----------|
| TraesCS3A02G522465 | 3A | 738502105 | 738504535 | 8.2  | 66216.53  |
| TraesCS5A02G274100 | 5A | 482902191 | 482904566 | 7.15 | 76870.74  |
| TraesCS6B02G037600 | 6B | 22081260  | 22105393  | 5.57 | 101481.11 |
| TraesCS5A02G323900 | 5A | 535528236 | 535531477 | 5.86 | 84271.59  |
| TraesCS3B02G591700 | 3B | 816170822 | 816173759 | 6.16 | 92096.68  |
| TraesCSU02G058438  | Un | 45771082  | 45773544  | 6.03 | 73359.01  |
| TraesCS6D02G032600 | 6D | 13724219  | 13735758  | 5.72 | 101545.25 |
| TraesCS7D02G085900 | 7D | 52829591  | 52832227  | 6    | 87140.72  |
| TraesCS2B02G617400 | 2B | 793971622 | 793975519 | 5.98 | 78945.72  |
| TraesCS2B02G537600 | 2B | 733062825 | 733073795 | 7.29 | 81115.65  |
| TraesCS6D02G395900 | 6D | 468180987 | 468185160 | 5.95 | 82316.73  |
| TraesCS5B02G366400 | 5B | 545278284 | 545280859 | 6.08 | 83794.6   |
| TraesCS3D02G527200 | 3D | 605704741 | 605708211 | 5.85 | 79445.05  |
| TraesCS7A02G091300 | 7A | 55395188  | 55398052  | 5.69 | 81235.4   |
| TraesCS5D02G256700 | 5D | 362885595 | 362890154 | 5.6  | 81277.67  |
| TraesCS7B02G463200 | 7B | 720131495 | 720134235 | 5.87 | 70497.51  |
| TraesCS5B02G458300 | 5B | 633175437 | 633179348 | 7.06 | 72897.44  |
| TraesCS7D02G087100 | 7D | 53482822  | 53485447  | 6.06 | 85267.09  |
| TraesCS2A02G381500 | 2A | 624965404 | 624967932 | 5.33 | 82083.89  |
| TraesCS6B02G394800 | 6B | 670209284 | 670213989 | 5.34 | 92852.15  |
| TraesCS6B02G460900 | 6B | 714329651 | 714336717 | 7.15 | 83781.52  |
| TraesCS1A02G012000 | 1A | 6899512   | 6903022   | 6.37 | 82880.2   |
| TraesCS1D02G016800 | 1D | 7583590   | 7587977   | 5.96 | 75504.75  |
| TraesCS3B02G596700 | 3B | 819502902 | 819507260 | 6.46 | 103184.7  |
| TraesCS5B02G449300 | 5B | 621476503 | 621480029 | 5.76 | 102157.91 |
| TraesCS3D02G533100 | 3D | 608924067 | 608931731 | 5.85 | 114802.61 |
| TraesCS4A02G351700 | 4A | 627360276 | 627363268 | 5.79 | 83802.28  |
| TraesCS6D02G050900 | 6D | 24375492  | 24377880  | 5.84 | 81917.72  |
| TraesCS6A02G342000 | 6A | 574524921 | 574530023 | 6.07 | 82577.24  |
| TraesCS5D02G052800 | 5D | 50635242  | 50646756  | 8.89 | 83848.67  |
| TraesCS1D02G355300 | 1D | 439927726 | 439931083 | 5.75 | 78183.08  |
| TraesCS4D02G005100 | 4D | 2990063   | 3000709   | 8.75 | 80576.42  |
| TraesCS7A02G091100 | 7A | 55374863  | 55377493  | 5.65 | 86538.78  |
| TraesCS7B02G371300 | 7B | 637351112 | 637364971 | 6.49 | 99688.33  |
| TraesCS1B02G076100 | 1B | 58930827  | 58933501  | 5.9  | 74782.58  |
| TraesCS3B02G548100 | 3B | 783618086 | 783623334 | 6.19 | 118333.87 |
| TraesCS2D02G508900 | 2D | 601602225 | 601606633 | 6.09 | 82858.43  |
| TraesCS6A02G027400 | 6A | 13806565  | 13809820  | 6.48 | 81566.46  |
| TraesCS1D02G058800 | 1D | 38726541  | 38729640  | 6.08 | 74099.66  |
| TraesCS5D02G524800 | 5D | 543608944 | 543612338 | 7.75 | 103231.05 |
| TraesCS3B02G596200 | 3B | 819186643 | 819192470 | 5.89 | 115196.91 |
| TraesCS4A02G391400 | 4A | 668146294 | 668148962 | 7.11 | 83175.04  |
| TraesCS6D02G362100 | 6D | 452839647 | 452842635 | 5.99 | 82613.39  |
| TraesCS5D02G330900 | 5D | 422000098 | 422003258 | 6.18 | 83461.05  |
| TraesCS2B02G464000 | 2B | 657842837 | 657845275 | 6.3  | 80321.79  |
| TraesCS5A02G445700 | 5A | 625732514 | 625738763 | 5.67 | 77846.31  |
| TraesCS6A02G061200 | 6A | 32897729  | 32900823  | 6.13 | 79581.1   |
| TraesCS5B02G324500 | 5B | 508680522 | 508683749 | 6.28 | 84153.5   |
| TraesCS6B02G015800 | 6B | 9281806   | 9286139   | 6.68 | 75642.12  |
| TraesCS5B02G035000 | 5B | 38157666  | 38160207  | 5.46 | 81123.5   |
| TraesCS6D02G361100 | 6D | 452472272 | 452474723 | 8.32 | 81787.99  |

|                    |    |           |           |      |           |
|--------------------|----|-----------|-----------|------|-----------|
| TraesCS2B02G087300 | 2B | 49329177  | 49334563  | 7.14 | 78919.25  |
| TraesCS5B02G043000 | 5B | 47589242  | 47593579  | 8.79 | 84497.22  |
| TraesCS5D02G520500 | 5D | 541934412 | 541937271 | 6.05 | 83238.8   |
| TraesCS2A02G071900 | 2A | 31970535  | 31978848  | 8.06 | 78931.23  |
| TraesCS3B02G141500 | 3B | 128363963 | 128370419 | 6.29 | 69505.32  |
| TraesCS5D02G096200 | 5D | 106519841 | 106525422 | 5.72 | 78332.24  |
| TraesCS5A02G249300 | 5A | 464158592 | 464170977 | 5.11 | 83909.39  |
| TraesCS6D02G395600 | 6D | 468095605 | 468100014 | 6.68 | 82561.11  |
| TraesCS2B02G151900 | 2B | 118629530 | 118632855 | 6.61 | 81666.09  |
| TraesCS6D02G063400 | 6D | 29768995  | 29772072  | 5.87 | 79168.52  |
| TraesCS7D02G463600 | 7D | 578790440 | 578793519 | 5.48 | 84146.01  |
| TraesCS2D02G511300 | 2D | 602739787 | 602775064 | 6.23 | 81490.59  |
| TraesCS7A02G242900 | 7A | 218244096 | 218247173 | 5.65 | 82955.81  |
| TraesCS5B02G367600 | 5B | 546093997 | 546097128 | 6.21 | 83475.26  |
| TraesCS7D02G545900 | 7D | 632857507 | 632860030 | 5.9  | 81236.39  |
| TraesCS1A02G003600 | 1A | 2229188   | 2236819   | 6.36 | 103083.87 |
| TraesCS2B02G563900 | 2B | 755626836 | 755629791 | 6.33 | 79434.04  |
| TraesCS1B02G009600 | 1B | 4785129   | 4791410   | 6.18 | 83317.18  |
| TraesCS6D02G361700 | 6D | 452585736 | 452588189 | 6.17 | 84839.64  |
| TraesCS5A02G043600 | 5A | 39916174  | 39930209  | 9.24 | 80528.05  |
| TraesCS1B02G352600 | 1B | 583398724 | 583406067 | 7.69 | 83607.31  |
| TraesCS7A02G565200 | 7A | 734686118 | 734688652 | 6.43 | 81176.55  |
| TraesCS2B02G588800 | 2B | 775357048 | 775360836 | 5.77 | 114038.5  |
| TraesCSU02G171400  | Un | 252681686 | 252684252 | 6.81 | 69625.32  |
| TraesCS7D02G497200 | 7D | 603792646 | 603796040 | 6.43 | 79367.34  |
| TraesCS7D02G085800 | 7D | 52821521  | 52823989  | 5.59 | 79854.09  |
| TraesCS6B02G413700 | 6B | 687096577 | 687099050 | 6.31 | 81586.36  |
| TraesCS3D02G527400 | 3D | 605953283 | 605956699 | 6.06 | 103025.79 |
| TraesCS5A02G444600 | 5A | 624710650 | 624713923 | 6.36 | 102664.21 |
| TraesCS5B02G526000 | 5B | 685565831 | 685569284 | 8.25 | 103216.03 |
| TraesCS7D02G053900 | 7D | 28414579  | 28416907  | 8.31 | 78279.93  |
| TraesCS5B02G454100 | 5B | 626838041 | 626843887 | 5.98 | 78592.15  |
| TraesCS1A02G016300 | 1A | 8665006   | 8669951   | 5.39 | 75197.41  |
| TraesCS2D02G070800 | 2D | 29875384  | 29880239  | 7.94 | 78673.03  |
| TraesCS7A02G062000 | 7A | 30796784  | 30801041  | 5.74 | 80758.67  |
| TraesCS6A02G377700 | 6A | 598924318 | 598926783 | 5.95 | 81514.64  |
| TraesCS6D02G394600 | 6D | 467856066 | 467860898 | 5.95 | 105448.09 |
| TraesCS6D02G210100 | 6D | 296751801 | 296754290 | 5.76 | 84157.61  |
| TraesCS6D02G056600 | 6D | 27056856  | 27059250  | 6.92 | 81487.99  |
| TraesCS2B02G580700 | 2B | 768103607 | 768106123 | 6.68 | 74800.67  |
| TraesCS5D02G374300 | 5D | 447303949 | 447306105 | 6.32 | 65396.37  |
| TraesCS2D02G070700 | 2D | 29836691  | 29844564  | 8.06 | 79092.5   |
| TraesCS1A02G340300 | 1A | 530515730 | 530523983 | 6.72 | 83462.92  |
| TraesCS5D02G256800 | 5D | 362968139 | 362975213 | 8.04 | 81493.74  |
| TraesCS6B02G100300 | 6B | 78453112  | 78456063  | 5.74 | 81923.15  |
| TraesCS7A02G563100 | 7A | 733433253 | 733439394 | 5.82 | 108002.98 |
| TraesCS4A02G448100 | 4A | 714896540 | 714902419 | 8.4  | 81624.61  |
| TraesCS1B02G021800 | 1B | 9939530   | 9942269   | 6.16 | 72723.98  |
| TraesCS3D02G527500 | 3D | 605971468 | 605974837 | 5.6  | 98957.3   |
| TraesCS6A02G377500 | 6A | 598789628 | 598792184 | 5.84 | 82815.72  |
| TraesCS4A02G026203 | 4A | 18010331  | 18013889  | 7.75 | 76328.48  |

|                    |    |           |           |      |           |
|--------------------|----|-----------|-----------|------|-----------|
| TraesCS3A02G034300 | 3A | 19342872  | 19374762  | 6.26 | 73820.79  |
| TraesCS6A02G377600 | 6A | 598859239 | 598861843 | 5.65 | 83572.58  |
| TraesCS2D02G378000 | 2D | 482380071 | 482382529 | 5.97 | 79673.72  |
| TraesCS5B02G273500 | 5B | 458896741 | 458900165 | 6.48 | 73606.89  |
| TraesCS3B02G295400 | 3B | 474002444 | 474028365 | 6.08 | 72477.87  |
| TraesCS7D02G241700 | 7D | 205942378 | 205944687 | 5.98 | 79006.59  |
| TraesCS2D02G509205 | 2D | 601716189 | 601729664 | 8.07 | 82984.92  |
| TraesCS6A02G225400 | 6A | 423533078 | 423535555 | 5.71 | 82189.33  |
| TraesCS3B02G595500 | 3B | 818441522 | 818444036 | 6.31 | 80048.12  |
| TraesCS1B02G050100 | 1B | 29923154  | 29931444  | 7.87 | 75042.61  |
| TraesCSU02G092400  | Un | 81993945  | 81996277  | 8.31 | 78638.45  |
| TraesCS6B02G459300 | 6B | 713822697 | 713827558 | 6.35 | 104857.87 |
| TraesCSU02G035250  | Un | 30238391  | 30245379  | 5.86 | 93798.53  |
| TraesCS5A02G261200 | 5A | 475265303 | 475269422 | 6.02 | 82326.29  |
| TraesCS1A02G011900 | 1A | 6883652   | 6887141   | 6.51 | 83297.53  |
| TraesCS4A02G482400 | 4A | 737707108 | 737710711 | 8.93 | 83461     |
| TraesCS6D02G010800 | 6D | 4149643   | 4152417   | 6.35 | 80740.44  |
| TraesCS5D02G452300 | 5D | 500136721 | 500140169 | 5.87 | 101847.67 |
| TraesCS3D02G494200 | 3D | 587046159 | 587050702 | 6.35 | 119207.55 |
| TraesCS5D02G374700 | 5D | 447501303 | 447510051 | 5.82 | 117060.55 |
| TraesCS1A02G058200 | 1A | 38711994  | 38715061  | 6.15 | 73819.61  |
| TraesCS2A02G071800 | 2A | 31952804  | 31957974  | 6.65 | 77887.7   |
| TraesCS6A02G376005 | 6A | 598056417 | 598059222 | 5.79 | 83828.6   |
| TraesCS5A02G084200 | 5A | 109957043 | 109967255 | 5.56 | 78399.16  |
| TraesCS5D02G043400 | 5D | 42925913  | 42928461  | 6.61 | 83689.94  |
| TraesCS1B02G075700 | 1B | 58552822  | 58558289  | 6.19 | 74803.7   |
| TraesCS6D02G028700 | 6D | 11069121  | 11074665  | 6.12 | 103282.19 |
| TraesCS6A02G000200 | 6A | 103455    | 110107    | 5.32 | 100468.16 |
| TraesCS2D02G046500 | 2D | 17011036  | 17013413  | 6.48 | 81221.05  |
| TraesCS3D02G046000 | 3D | 17513600  | 17538118  | 6.26 | 71904.91  |
| TraesCS2B02G059400 | 2B | 28883113  | 28885490  | 8.01 | 81036.02  |
| TraesCS3A02G006900 | 3A | 7384784   | 7389062   | 5.09 | 82493.49  |
| TraesCS5A02G249600 | 5A | 464206324 | 464210946 | 7.61 | 81616.52  |
| TraesCS6B02G056400 | 6B | 36764447  | 36773780  | 5.71 | 75461.32  |
| TraesCS6D02G395400 | 6D | 468056247 | 468060799 | 5.8  | 82633.94  |
| TraesCS3A02G522100 | 3A | 738304030 | 738307517 | 6.81 | 106923.37 |
| TraesCS6A02G008400 | 6A | 3351576   | 3359760   | 6.27 | 102602.01 |
| TraesCS2A02G047800 | 2A | 18544624  | 18546971  | 8.42 | 81231.56  |
| TraesCS2D02G002600 | 2D | 2045570   | 2048979   | 5.98 | 79689.29  |
| TraesCS5B02G449200 | 5B | 621467718 | 621471226 | 6.25 | 102330.69 |
| TraesCS5D02G520600 | 5D | 541943276 | 541946160 | 5.92 | 83841.41  |
| TraesCS6D02G069500 | 6D | 34947606  | 34951802  | 7.85 | 83098.87  |
| TraesCS6D02G361400 | 6D | 452483344 | 452485884 | 5.81 | 82200.37  |
| TraesCS5B02G452300 | 5B | 625114904 | 625118686 | 5.59 | 77883.32  |
| TraesCS6B02G073000 | 6B | 49435434  | 49437836  | 6.68 | 81437.12  |
| TraesCS6A02G361700 | 6A | 591983346 | 591986913 | 5.11 | 78904.75  |
| TraesCS5B02G089800 | 5B | 115412946 | 115419618 | 5.6  | 78466.29  |
| TraesCS4A02G391000 | 4A | 667858921 | 667861337 | 5.61 | 79872.36  |
| TraesCSU02G060500  | Un | 47477823  | 47480382  | 6.63 | 83685.13  |
| TraesCS1B02G020200 | 1B | 9489888   | 9494840   | 5.69 | 75163.47  |
| TraesCS3A02G033400 | 3A | 19275574  | 19307908  | 6.88 | 73831.42  |

|                    |    |           |           |      |           |
|--------------------|----|-----------|-----------|------|-----------|
| TraesCS3B02G098900 | 3B | 66416023  | 66420917  | 6.43 | 83972.72  |
| TraesCS2B02G536500 | 2B | 732038730 | 732042160 | 7.72 | 82905.58  |
| TraesCS6D02G210200 | 6D | 296824053 | 296826571 | 5.9  | 82304.68  |
| TraesCS3D02G433100 | 3D | 546385369 | 546389635 | 6.26 | 100565.67 |
| TraesCS2A02G381400 | 2A | 624941477 | 624944012 | 5.89 | 82217.34  |
| TraesCS1B02G031700 | 1B | 15517132  | 15519874  | 5.78 | 84868.76  |
| TraesCS5B02G454700 | 5B | 628694453 | 628698250 | 5.66 | 77956.42  |
| TraesCS3A02G527700 | 3A | 742223286 | 742228725 | 6.45 | 83282.23  |
| TraesCS3D02G124200 | 3D | 81811610  | 81816263  | 6.67 | 70255.17  |
| TraesCS5D02G373400 | 5D | 446875637 | 446878019 | 5.47 | 75565.27  |
| TraesCS5D02G374600 | 5D | 447424033 | 447432881 | 7.26 | 115931.87 |
| TraesCS5D02G373700 | 5D | 447140899 | 447143332 | 6.88 | 82028.03  |
| TraesCS5A02G052900 | 5A | 47956085  | 47965326  | 8.15 | 76698.8   |
| TraesCS1D02G342300 | 1D | 431959024 | 431969140 | 6.68 | 83643.14  |
| TraesCS6B02G459600 | 6B | 713906121 | 713910713 | 6.01 | 105332.88 |
| TraesCS5B02G324400 | 5B | 508675400 | 508678513 | 6.21 | 78686.13  |
| TraesCS7A02G425900 | 7A | 619031130 | 619036498 | 6.22 | 102968.21 |
| TraesCS2D02G070600 | 2D | 29740198  | 29745369  | 7.63 | 77599.45  |
| TraesCS6B02G458200 | 6B | 713458733 | 713462914 | 5.48 | 104971.19 |
| TraesCS5A02G323800 | 5A | 535519780 | 535522946 | 6.47 | 78865.55  |
| TraesCS4A02G391600 | 4A | 668160224 | 668162842 | 6.17 | 82887.58  |
| TraesCS6A02G376200 | 6A | 598154841 | 598157729 | 5.81 | 82211.42  |
| TraesCS5B02G363100 | 5B | 542191917 | 542201967 | 5.57 | 81635.19  |
| TraesCS5A02G035300 | 5A | 32710473  | 32712965  | 5.45 | 83016.85  |
| TraesCS1A02G035700 | 1A | 19891661  | 19894572  | 5.82 | 82144.66  |
| TraesCS7D02G087200 | 7D | 53496070  | 53498725  | 6.85 | 83300.33  |
| TraesCS7B02G074949 | 7B | 84440355  | 84454127  | 5.58 | 80754.22  |
| TraesCS2D02G550900 | 2D | 626592699 | 626595268 | 6.42 | 82268.01  |
| TraesCS5B02G366900 | 5B | 545575101 | 545577514 | 6.36 | 82172.15  |
| TraesCS7A02G242800 | 7A | 218236980 | 218240288 | 5.81 | 80853.02  |
| TraesCS7D02G480100 | 7D | 591007952 | 591011507 | 6.32 | 99260.68  |
| TraesCS1D02G014900 | 1D | 7073574   | 7077996   | 5.69 | 75059.33  |
| TraesCS6D02G362200 | 6D | 452906242 | 452908749 | 6.11 | 83607.97  |
| TraesCS3A02G521900 | 3A | 738236580 | 738240286 | 5.95 | 101595.47 |
| TraesCS2B02G088100 | 2B | 49840858  | 49846533  | 7.95 | 77386.43  |
| TraesCS2D02G509200 | 2D | 601708288 | 601711721 | 6.13 | 80734.5   |
| TraesCS1B02G043400 | 1B | 22822038  | 22825042  | 5.49 | 80363.31  |
| TraesCS6B02G101400 | 6B | 79716116  | 79720002  | 5.63 | 81561.48  |
| TraesCS5D02G477400 | 5D | 516637297 | 516640503 | 6.39 | 78261.61  |
| TraesCS7D02G087000 | 7D | 53431568  | 53434270  | 5.65 | 79570.19  |
| TraesCS7A02G091500 | 7A | 55880890  | 55883552  | 6.87 | 83354.29  |
| TraesCS3D02G046900 | 3D | 17642214  | 17670884  | 7.48 | 73507.9   |
| TraesCS5B02G247400 | 5B | 429093234 | 429097373 | 5.5  | 81881.82  |
| TraesCS2B02G464100 | 2B | 657850507 | 657854763 | 5.97 | 90787.04  |
| TraesCS7A02G425700 | 7A | 618681007 | 618684442 | 6.31 | 103769.92 |
| TraesCS6A02G376500 | 6A | 598189143 | 598191599 | 6.95 | 85001.12  |
| TraesCS6B02G001500 | 6B | 1002899   | 1011655   | 5.73 | 102401.37 |
| TraesCS5D02G043500 | 5D | 42930408  | 42932902  | 5.53 | 82882.47  |
| TraesCS6B02G059800 | 6B | 39367149  | 39369522  | 5.87 | 80924.51  |
| TraesCS7A02G013700 | 7A | 6297519   | 6300866   | 8.91 | 83819.35  |
| TraesCS2D02G377900 | 2D | 482348502 | 482351038 | 6.02 | 82356.25  |

|                    |    |           |           |      |           |
|--------------------|----|-----------|-----------|------|-----------|
| TraesCS2B02G580400 | 2B | 768057737 | 768060299 | 6.71 | 82464.27  |
| TraesCS6B02G256300 | 6B | 460274455 | 460276943 | 5.62 | 84150.45  |
| TraesCS2A02G047600 | 2A | 18422624  | 18424973  | 6.96 | 81084.96  |
| TraesCS4A02G310100 | 4A | 603034418 | 603038171 | 7.86 | 86144.57  |
| TraesCS5B02G259500 | 5B | 441664962 | 441671873 | 6.2  | 81828.03  |
| TraesCS6D02G070300 | 6D | 35491069  | 35494006  | 5.59 | 73255.7   |
| TraesCS5B02G368200 | 5B | 546564774 | 546569512 | 5.81 | 116895.93 |
| TraesCS6B02G095800 | 6B | 71866745  | 71870919  | 6.31 | 83126.33  |
| TraesCS3A02G262100 | 3A | 484990152 | 485011560 | 5.97 | 72078.34  |
| TraesCS7A02G086200 | 7A | 50233883  | 50243641  | 8.5  | 84504.31  |
| TraesCS6D02G395700 | 6D | 468146021 | 468153256 | 8.13 | 82835.53  |
| TraesCS5A02G444700 | 5A | 624722259 | 624725853 | 5.49 | 102278.66 |
| TraesCS2D02G509500 | 2D | 601963045 | 601971739 | 6.91 | 82702.99  |
| TraesCS6B02G414000 | 6B | 687177971 | 687180528 | 5.85 | 82670.9   |
| TraesCS7D02G457100 | 7D | 575593547 | 575597343 | 6.3  | 94774.73  |
| TraesCS6B02G415100 | 6B | 687954847 | 687957416 | 5.64 | 83867.03  |
| TraesCS3B02G596500 | 3B | 819363575 | 819368342 | 6.61 | 114453.35 |
| TraesCS3B02G596900 | 3B | 819629205 | 819634842 | 6.34 | 111076.19 |
| TraesCS6B02G374000 | 6B | 646741271 | 646745692 | 6.25 | 82956.51  |
| TraesCS6B02G002495 | 6B | 1934367   | 1938637   | 6.25 | 99144.68  |
| TraesCS6B02G040700 | 6B | 25254295  | 25257306  | 5.39 | 81614.58  |
| TraesCS5A02G464700 | 5A | 644097724 | 644105497 | 6.79 | 78486.11  |
| TraesCS6B02G035500 | 6B | 20960021  | 20963527  | 6.28 | 101877.01 |
| TraesCS5D02G452200 | 5D | 500131532 | 500135172 | 6.26 | 102075.99 |
| TraesCS2D02G442000 | 2D | 552192520 | 552195005 | 7.16 | 80929.48  |
| TraesCS1A02G017700 | 1A | 9232851   | 9236545   | 6.53 | 75430.92  |
| TraesCS5A02G365300 | 5A | 565488362 | 565490747 | 6.14 | 82012.98  |
| TraesCS3B02G474400 | 3B | 723456694 | 723460964 | 6.38 | 97809.69  |
| TraesCS5D02G374500 | 5D | 447392270 | 447396923 | 5.9  | 83373.12  |
| TraesCS7D02G086900 | 7D | 53424657  | 53427269  | 5.59 | 85060     |
| TraesCS6D02G001400 | 6D | 602989    | 606229    | 6.19 | 77743.12  |
| TraesCS6B02G415000 | 6B | 687873635 | 687877196 | 5.72 | 69576.51  |
| TraesCS4A02G391100 | 4A | 668083351 | 668085963 | 5.68 | 85047.02  |
| TraesCS5B02G521800 | 5B | 683992331 | 683995223 | 5.67 | 83939.3   |
| TraesCS5D02G330600 | 5D | 421986024 | 421989160 | 6.53 | 79278.98  |
| TraesCS3B02G596300 | 3B | 819279232 | 819285034 | 5.79 | 114595.45 |
| TraesCS6D02G361000 | 6D | 452468325 | 452470786 | 6.46 | 84173.05  |
| TraesCS3A02G522900 | 3A | 738690614 | 738694017 | 5.7  | 101836    |
| TraesCS7A02G091400 | 7A | 55425870  | 55428494  | 5.83 | 84949.75  |
| TraesCS3A02G533100 | 3A | 745897952 | 745900476 | 6.68 | 79833.05  |
| TraesCS6B02G414900 | 6B | 687731774 | 687734202 | 5.68 | 79418.61  |
| TraesCS6B02G010600 | 6B | 6337591   | 6344270   | 7.41 | 74853.28  |
| TraesCS2A02G093100 | 2A | 47308990  | 47311758  | 5.96 | 74220.31  |
| TraesCS1D02G016200 | 1D | 7429822   | 7445013   | 5.49 | 74918.99  |
| TraesCS1D02G005000 | 1D | 2436388   | 2448831   | 5.78 | 103548.45 |
| TraesCS2A02G564700 | 2A | 764770326 | 764777742 | 6.53 | 78626.5   |
| TraesCS6A02G043900 | 6A | 22953051  | 22955436  | 6.04 | 81734.44  |
| TraesCS3B02G049100 | 3B | 24911564  | 24944677  | 7.61 | 76449.23  |
| TraesCS5A02G249400 | 5A | 464176028 | 464189376 | 5.35 | 80112.43  |
| TraesCS6B02G055400 | 6B | 35720447  | 35723485  | 6.42 | 77077.06  |
| TraesCS7B02G371500 | 7B | 637568353 | 637590300 | 6.19 | 77624.61  |

|                    |    |           |           |      |           |
|--------------------|----|-----------|-----------|------|-----------|
| TraesCS7B02G418300 | 7B | 686647785 | 686651155 | 6.19 | 79491.4   |
| TraesCS4A02G347600 | 4A | 625485636 | 625488601 | 7.63 | 86850.97  |
| TraesCS5D02G520800 | 5D | 541952326 | 541955371 | 5.84 | 82857.47  |
| TraesCS6B02G256200 | 6B | 460206606 | 460209974 | 8.98 | 71179.81  |
| TraesCS3D02G083900 | 3D | 42631309  | 42636418  | 6.63 | 83649.46  |
| TraesCS1B02G004100 | 1B | 2354630   | 2357674   | 8.5  | 78674.56  |
| TraesCS6B02G413900 | 6B | 687132887 | 687135346 | 6.06 | 85210.09  |
| TraesCS7D02G085600 | 7D | 52695202  | 52697718  | 5.87 | 85018.82  |
| TraesCS6D02G002500 | 6D | 1508029   | 1517724   | 5.81 | 102903.78 |
| TraesCS6D02G032300 | 6D | 13598846  | 13601831  | 5.34 | 81410.44  |
| TraesCS5D02G365500 | 5D | 442694824 | 442697321 | 6.51 | 83023.1   |
| TraesCS4D02G042300 | 4D | 19752190  | 19755893  | 6.45 | 78086.47  |
| TraesCS6B02G034300 | 6B | 20698716  | 20706056  | 5.81 | 101697.31 |
| TraesCS3B02G474500 | 3B | 723463620 | 723467882 | 6.1  | 100324.39 |
| TraesCS7B02G378200 | 7B | 642562766 | 642568465 | 5.37 | 81324.05  |
| TraesCS3A02G522300 | 3A | 738431512 | 738435697 | 5.38 | 100361.24 |

---
